# Supplementary material for: Polyphenol Oxidases in Crops: Biochemical, Physiological and Genetic Aspects
Source: Int J Mol Sci. 2017 Feb 10;18(2):377. doi: 10.3390/ijms18020377 (PMC5343912; doi:10.3390/ijms18020377)
Supplement: Supplementary file 1 [file ijms-18-00377-s001.xlsx]

## Sheet: Foglio1
Supplementary Table 1. List not esaustive of PPO genes in Solanaceae and Poacee species
Species	Taxonomic Classification	Gene	Chromosome	Alleles	Gene Bank Accession	Refecences
Tomato	Solanum lycopersicum	A/A'	8	n.a.	XP_004246029.2	Newman et al., 1993
		B	8	n.a.	NP_001296326.1	Newman et al., 1993
		C	8	n.a.	Q08305	Newman et al., 1993
		D	8	n.a.	XP_004246030	Newman et al., 1993
		E	8	n.a.	NP_001318057	Newman et al., 1993
		F	8	n.a.	NP_001318059	Newman et al., 1993
Potato	Solaum tuberosum	PPO-P1	8	n.a.	M95196	Hunt et al., 1993
		PPO-P2	8	n.a.	M95197	Thygesen et al., 1995
		POT32	8	n.a.	U22921	Thygesen et al., 1995
		POT33	8	n.a.	U22922	Thygesen et al., 1995
		POT72	8	n.a.	U22923	Thygesen et al., 1995
		StuPPO1	8	n.a.	XM_006355177	Chi et al., 2014
		StuPPO2	8	n.a.	XM_006365321	Chi et al., 2014
		StuPPO3	8	n.a.	XM_006365320	Chi et al., 2014
		StuPPO4	8	n.a.	U22923	Chi et al., 2014
		StuPPO5	8	n.a.	XR_183056	Chi et al., 2014
		StuPPO6	8	n.a.	XM_004245989	Chi et al., 2014
		StuPPO7	8	n.a.	XR_183056	Chi et al., 2014
		StuPPO8	8	n.a.	XM_006365329	Chi et al., 2014
		StuPPO9	2	n.a.	XM_006347021	Chi et al., 2014
Eggplant	Solanum melongena	SmePPO1	8	n.a.	ACT22523	Shetty et al., 2011
		SmePPO2	8	n.a.	ADG56700	Shetty et al., 2011
		SmePPO3	8	n.a.	ADY18409	Shetty et al., 2011
		SmePPO4	8	n.a.	ADY18410	Shetty et al., 2011
		SmePPO5	8	n.a.	ADY18411	Shetty et al., 2011
		SmePPO6	8	n.a.	ADY18412	Shetty et al., 2011
Wheat	Triticum aestivum ssp. aestivum	Ppo-A1	2AL	a	EF070147	He et al. 2007
	Triticum turgidum ssp. dicoccoides			b	EF070148	He et al. 2009
	Triticum urartu			c	EU371651	He et al. 2009
	Triticum boeticum			d	EU371652	He et al. 2009
	Triticum monococcum			e	EU371653	He et al. 2009
	Triticum turgidum ssp. dicoccoides			f	EU371654	He et al. 2009
	Triticum turgidum ssp. durum			g	EU371655	He et al. 2009
	Triticum aestivum ssp. aestivum			h	JN632506	Beecher et al. 2012
	Triticum aestivum ssp. aestivum	Ppo-B1	2BL	a	GQ303713	He et al. 2009
	Triticum turgidum ssp. durum			b	KX950792	Taranto et al. 2015
	Triticum turgidum ssp. durum			c	KX950793	Taranto et al. 2015
	Triticum turgidum ssp. durum			d	KX950794	Taranto et al. 2015
	Triticum aestivum ssp. aestivum	Ppo-D1	2DL	a	EF070149	He et al. 2007
	Triticum aestivum ssp. aestivum			b	EF070150	He et al. 2007
	Aegilops tauschi			c	EU371656	He et al. 2009
	Aegilops tauschi			d	EU371657	He et al. 2009
	Triticum aestivum ssp. aestivum	Ppo-A2	2AL	a	HQ228148	Beecher and Skinner 2011
	Triticum aestivum ssp. aestivum			b	HQ228149	Beecher and Skinner 2011
	Triticum aestivum ssp. aestivum			c	JN632507	Beecher et al. 2012
	Triticum aestivum ssp. aestivum			d	KJ567060	Hystad et al. 2015
	Triticum aestivum ssp. aestivum	Ppo-B2	2BL	a	HQ228150	Beecher and Skinner 2011
	Triticum aestivum ssp. aestivum			b	HQ228151	Beecher and Skinner 2011
	Triticum aestivum ssp. aestivum			c	JN632508	Beecher et al. 2012
	Triticum turgidum ssp. durum			d	KX950795	Taranto et al. 2015
	Triticum aestivum ssp. aestivum	Ppo-D2	2DL	a	HQ228152	Beecher and Skinner 2011
	Triticum aestivum ssp. aestivum			b	HQ228153	Beecher and Skinner 2011
Barley	Hordeum vulgare subsp. vulgare	PPO1	2HL	n.a.	AB549330	Taketa et al. 2010
	Hordeum chilense			n.a.	KJ472485	Rodriguez-Suarez Atienza 2014
	Hordeum chilense			n.a.	KJ472486	Rodriguez-Suarez Atienza 2014
	Hordeum vulgare subsp. vulgare	PPO2	2HL	n.a.	AB549331	Taketa et al. 2010
	Hordeum chilense			n.a.	KJ472487	Rodriguez-Suarez Atienza 2014
	Hordeum chilense			n.a.	KJ472488	Rodriguez-Suarez Atienza 2014
Maize	Zea mays	PPO1	9	n.a.	EU956830	Alexandrov et al. 2009
	Zea mays	PPO2	10	n.a.	EU963699	Alexandrov et al. 2009
Cereal grass	Sorghum bicolor	Sb06PPO1	6	n.a.	KJ425574	Yan et al. 2014
	Sorghum bicolor			n.a.	KJ425575	Yan et al. 2015
	Sorghum bicolor	Sb06PPO2	6	n.a.	KJ425576	Yan et al. 2016
	Sorghum bicolor			n.a.	KJ425577	Yan et al. 2017
Foxtail millet	Setaria italica	Si7PPO	7	n.a.	LC008429	Inoue et al. 2015
	Setaria italica			n.a.	LC008430	Inoue et al. 2015
	Setaria italica			n.a.	LC008431	Inoue et al. 2015
	Setaria italica			n.a.	LC008432	Inoue et al. 2015
	Setaria italica			n.a.	LC008434	Inoue et al. 2015
	Setaria italica ssp. viridis			n.a.	LC008441	Inoue et al. 2015
	Setaria italica ssp. viridis			n.a.	LC008442	Inoue et al. 2015
Rice	Oryza sativa ssp. indica	PPO	4	n.a.	DQ532375	Yu et al. 2008
	Oryza sativa ssp. japonica			n.a.	DQ532376	Yu et al. 2008
				n.a.	DQ532377	Yu et al. 2008
				n.a.	DQ532378	Yu et al. 2008
				n.a.	DQ532379	Yu et al. 2008
				n.a.	DQ532380	Yu et al. 2008
				n.a.	DQ532381	Yu et al. 2008
				n.a.	DQ532382	Yu et al. 2008
				n.a.	DQ532383	Yu et al. 2008
				n.a.	DQ532384	Yu et al. 2008
				n.a.	DQ532385	Yu et al. 2008
				n.a.	DQ532386	Yu et al. 2008
				n.a.	DQ532387	Yu et al. 2008
				n.a.	DQ532388	Yu et al. 2008
				n.a.	DQ532389	Yu et al. 2008
	Oryza sativa ssp. indica			n.a.	DQ532390	Yu et al. 2008
				n.a.	DQ532391	Yu et al. 2008
				n.a.	DQ532392	Yu et al. 2008
				n.a.	DQ532393	Yu et al. 2008
				n.a.	DQ532394	Yu et al. 2008
				n.a.	DQ532395	Yu et al. 2008
				n.a.	DQ532396	Yu et al. 2008
	Oryza rufipogon			n.a.	DQ532397	Yu et al. 2008
	Oryza nivara			n.a.	DQ532398	Yu et al. 2008
	Oryza rufipogon			n.a.	DQ532399	Yu et al. 2008
				n.a.	DQ532400	Yu et al. 2008
				n.a.	DQ532401	Yu et al. 2008
				n.a.	DQ532402	Yu et al. 2008
				n.a.	DQ532403	Yu et al. 2008
				n.a.	DQ532404	Yu et al. 2008
				n.a.	DQ532405	Yu et al. 2008
				n.a.	DQ532406	Yu et al. 2008
				n.a.	DQ532407	Yu et al. 2008
				n.a.	DQ532408	Yu et al. 2008
				n.a.	DQ532409	Yu et al. 2008
	Oryza nivara			n.a.	DQ532410	Yu et al. 2008
	Oryza rufipogon			n.a.	DQ532411	Yu et al. 2008
	Oryza rufipogon			n.a.	DQ532412	Yu et al. 2008
	Oryza rufipogon			n.a.	DQ532413	Yu et al. 2008
	Oryza alta			n.a.	DQ532414	Yu et al. 2008
	Oryza rufipogon			n.a.	DQ532415	Yu et al. 2008
				n.a.	DQ532416	Yu et al. 2008
				n.a.	DQ532417	Yu et al. 2008
				n.a.	DQ532418	Yu et al. 2008
				n.a.	DQ532419	Yu et al. 2008
				n.a.	DQ532420	Yu et al. 2008
				n.a.	DQ532421	Yu et al. 2008
				n.a.	DQ532422	Yu et al. 2008
				n.a.	DQ532423	Yu et al. 2008
				n.a.	DQ532424	Yu et al. 2008
				n.a.	DQ532425	Yu et al. 2008
				n.a.	DQ532426	Yu et al. 2008
				n.a.	DQ532427	Yu et al. 2008
				n.a.	DQ532428	Yu et al. 2008
				n.a.	DQ532429	Yu et al. 2008
	Oryza barthii			n.a.	DQ532430	Yu et al. 2009
	Oryza officinalis			n.a.	DQ532431	Yu et al. 2008
	Oryza glaberrima			n.a.	DQ532432	Yu et al. 2008
	Oryza sativa (red rice)			n.a.	GQ121704	Gross et al. 2009
				n.a.	GQ121710	Gross et al. 2009
				n.a.	GQ121714	Gross et al. 2009
				n.a.	GQ121715	Gross et al. 2009
				n.a.	GQ121717	Gross et al. 2009
				n.a.	GQ121718	Gross et al. 2009
				n.a.	GQ121721	Gross et al. 2009
